# Supplementary material for: Identification of QTLs and Candidate Loci Associated with Drought-Related Traits of the K/Z RIL Rice Population
Source: Research Square preprint supplement (doi:10.21203/rs.3.rs-1609741/v1), 2022-05-12
Supplement: Supplementary file 3 [file 6d864faa6407bc95b9e4edad.xlsx]

## Sheet: Supplemental Table S7
	# The following table is formatted as tab separated values.					Variant impact				Variant effect
#	#GeneName		GeneId	TranscriptId	BioType	HIGH	LOW	MODERATE	MODIFIER	3' UTR variant	5' UTR premature start codon gain variant	5' UTR variant	downstream gene variant	intron variant	missense variant	splice acceptor variant	splice donor variant	splice region variant	start lost	stop gained	stop lost	stop retained variant	synonymous variant	upstream gene variant
1	LOC_Os01g66270	1	LOC_Os01g66270	LOC_Os01g66270.1	protein_coding	0	2	2	68	0	0	0	11	0	2	0	0	0	0	0	0	0	2	57
2	LOC_Os02g44590	1	LOC_Os02g44590	LOC_Os02g44590.1	protein_coding	0	3	3	61	8	0	0	17	0	3	0	0	0	0	0	0	0	3	36
3	LOC_Os02g44599	1	LOC_Os02g44599	LOC_Os02g44599.1	protein_coding	0	2	0	57	12	1	4	21	3	0	0	0	0	0	0	0	0	1	17
	LOC_Os02g44599	1	LOC_Os02g44599	LOC_Os02g44599.2	protein_coding	0	2	0	57	12	1	4	21	3	0	0	0	0	0	0	0	0	1	17
	LOC_Os02g44599	1	LOC_Os02g44599	LOC_Os02g44599.3	protein_coding	0	3	0	56	12	1	3	21	4	0	0	0	1	0	0	0	0	1	17
	LOC_Os02g44599	1	LOC_Os02g44599	LOC_Os02g44599.4	protein_coding	0	2	0	51	6	1	4	21	3	0	0	0	0	0	0	0	0	1	17
4	LOC_Os02g44610	1	LOC_Os02g44610	LOC_Os02g44610.1	protein_coding	1	9	3	157	0	0	0	128	16	3	0	1	5	0	0	0	2	5	16
5	LOC_Os02g44620	1	LOC_Os02g44620	LOC_Os02g44620.1	protein_coding	0	3	1	243	0	0	0	106	15	1	0	0	0	0	0	0	0	3	122
6	LOC_Os02g44630	1	LOC_Os02g44630	LOC_Os02g44630.1	protein_coding	0	0	0	174	2	0	0	45	12	0	0	0	0	0	0	0	0	0	115
	LOC_Os02g44630	1	LOC_Os02g44630	LOC_Os02g44630.2	protein_coding	0	0	0	174	2	0	0	45	12	0	0	0	0	0	0	0	0	0	115
	LOC_Os02g44630	1	LOC_Os02g44630	LOC_Os02g44630.3	protein_coding	0	0	0	174	4	0	0	45	10	0	0	0	0	0	0	0	0	0	115
7	LOC_Os02g44642	1	LOC_Os02g44642	LOC_Os02g44642.1	protein_coding	0	3	1	244	1	0	3	64	171	1	0	0	1	0	0	0	0	2	6
8	LOC_Os02g54160	1	LOC_Os02g54160	LOC_Os02g54160.1	protein_coding	0	0	1	94	0	0	0	6	3	1	0	0	0	0	0	0	0	0	85
	LOC_Os02g54160	1	LOC_Os02g54160	LOC_Os02g54160.2	protein_coding	0	0	1	94	1	0	0	6	2	1	0	0	0	0	0	0	0	0	85
9	LOC_Os03g56280	1	LOC_Os03g56280	LOC_Os03g56280.1	protein_coding	0	2	0	59	0	0	4	15	30	0	0	0	0	0	0	0	0	2	10
10	LOC_Os04g44190	1	LOC_Os04g44190	LOC_Os04g44190.1	protein_coding	0	0	0	10	0	0	0	0	9	0	0	0	0	0	0	0	0	0	1
	LOC_Os04g44190	1	LOC_Os04g44190	LOC_Os04g44190.2	protein_coding	0	0	0	10	0	0	0	0	9	0	0	0	0	0	0	0	0	0	1
11	LOC_Os05g49010	1	LOC_Os05g49010	LOC_Os05g49010.1	protein_coding	0	2	1	50	0	0	0	36	0	1	0	0	0	0	0	0	0	2	14
12	LOC_Os05g49210	1	LOC_Os05g49210	LOC_Os05g49210.1	protein_coding	0	6	10	38	0	0	0	13	4	10	0	0	0	0	0	0	0	6	21
13	LOC_Os05g49240	1	LOC_Os05g49240	LOC_Os05g49240.1	protein_coding	0	2	0	60	2	0	1	35	5	0	0	0	0	0	0	0	0	2	17
14	LOC_Os06g49080	1	LOC_Os06g49080	LOC_Os06g49080.1	protein_coding	0	2	4	62	1	0	0	34	11	4	0	0	0	0	0	0	0	2	16
15	LOC_Os07g02520	1	LOC_Os07g02520	LOC_Os07g02520.1	protein_coding	0	0	1	153	0	0	0	23	0	1	0	0	0	0	0	0	0	0	130
16	LOC_Os08g06344	1	LOC_Os08g06344	LOC_Os08g06344.1	protein_coding	0	7	4	107	8	0	1	34	1	4	0	0	0	0	0	0	0	7	63
	LOC_Os08g06344	1	LOC_Os08g06344	LOC_Os08g06344.2	protein_coding	0	7	4	107	8	0	0	34	1	4	0	0	0	0	0	0	0	7	64
	LOC_Os08g06344	1	LOC_Os08g06344	LOC_Os08g06344.3	protein_coding	0	7	4	107	8	0	0	34	1	4	0	0	0	0	0	0	0	7	64
17	LOC_Os09g08120	1	LOC_Os09g08120	LOC_Os09g08120.1	protein_coding	1	5	11	292	0	0	2	34	148	11	0	0	0	0	1	0	0	5	108
18	LOC_Os10g07030	1	LOC_Os10g07030	LOC_Os10g07030.1	protein_coding	2	34	60	821	0	0	0	322	111	60	0	0	5	0	2	0	0	32	390
19	LOC_Os10g07040	1	LOC_Os10g07040	LOC_Os10g07040.1	protein_coding	0	57	29	984	0	0	0	396	44	29	0	0	0	0	0	0	0	57	544
20	LOC_Os10g07050	1	LOC_Os10g07050	LOC_Os10g07050.1	protein_coding	2	8	11	931	0	0	0	480	29	11	0	0	1	0	2	0	0	8	422
21	LOC_Os10g07060	1	LOC_Os10g07060	LOC_Os10g07060.1	protein_coding	0	0	6	838	0	0	0	108	0	6	0	0	0	0	0	0	0	0	730
22	LOC_Os10g07080	1	LOC_Os10g07080	LOC_Os10g07080.1	protein_coding	1	2	3	546	5	1	4	71	5	3	1	0	0	0	0	0	0	1	462
23	LOC_Os10g41460	1	LOC_Os10g41460	LOC_Os10g41460.1	protein_coding	0	3	2	80	1	0	0	21	0	2	0	0	0	0	0	0	0	3	58
24	LOC_Os11g30760	1	LOC_Os11g30760	LOC_Os11g30760.1	protein_coding	0	3	3	203	1	0	1	84	0	3	0	0	0	0	0	0	0	3	117
	LOC_Os11g30760	1	LOC_Os11g30760	LOC_Os11g30760.2	protein_coding	0	2	3	204	1	0	1	84	1	3	0	0	0	0	0	0	0	2	117
25	LOC_Os12g02700	1	LOC_Os12g02700	LOC_Os12g02700.1	protein_coding	0	5	1	20	7	0	1	3	0	1	0	0	0	0	0	0	0	5	9
26	LOC_Os12g29330	1	LOC_Os12g29330	LOC_Os12g29330.1	protein_coding	0	17	2	215	7	3	7	143	3	2	0	0	2	0	0	0	0	12	57
						7	200	171	7601	109	8	40	2561	666	171	1	1	15	0	5	0	2	182	4235

## Sheet: 26 loci for reference
	LOC_Os01g66270
	LOC_Os02g44590
	LOC_Os02g44599
	LOC_Os02g44610
	LOC_Os02g44620
	LOC_Os02g44630
	LOC_Os02g44642
	LOC_Os02g54160
	LOC_Os03g56280
	LOC_Os04g44190
	LOC_Os05g49010
	LOC_Os05g49210
	LOC_Os05g49240
	LOC_Os06g49080
	LOC_Os07g02520
	LOC_Os08g06344
	LOC_Os09g08120
	LOC_Os10g07030
	LOC_Os10g07040
	LOC_Os10g07050
	LOC_Os10g07060
	LOC_Os10g07080
	LOC_Os10g41460
	LOC_Os11g30760
	LOC_Os12g02700
	LOC_Os12g29330
