# Supplementary material for: Identification of QTLs and Candidate Loci Associated with Drought-Related Traits of the K/Z RIL Rice Population
Source: Research Square preprint supplement (doi:10.21203/rs.3.rs-1609741/v1), 2022-05-12
Supplement: Supplementary file 5 [file 8705e79b7d5524b9e47fc23e.docx]

**Table S5.** Phenotypic correlation between grain yield components and morphological traits of the K/Z RIL population under WW & DS conditions

|  | HD | | FLW | | DLR | | PH-WW | | PH-DS | | TN-WW | | TN-DS | | SP-WW | | SP-DS | | PL-WW | | PL-DS | | PPB-WW | | PPB-DS | FG-WW | FG-DS | BY-WW |
| --- | --- | --- | --- | --- | --- | --- | --- | --- | --- | --- | --- | --- | --- | --- | --- | --- | --- | --- | --- | --- | --- | --- | --- | --- | --- | --- | --- | --- |
| FLW | | -0.132 | |  | |  | |  | |  | |  | |  | |  | |  | |  | |  | |  |  |  |  |  |
| DLR | | 0.078 | | 0.067 | |  | |  | |  | |  | |  | |  | |  | |  | |  | |  |  |  |  |  |
| PH-WW | | -0.119 | | -0.044 | | -0.124 | |  | |  | |  | |  | |  | |  | |  | |  | |  |  |  |  |  |
| PH-DS | | -0.154 | | 0.282 | | 0.078 | | 0.315 | |  | |  | |  | |  | |  | |  | |  | |  |  |  |  |  |
| TN-WW | | 0.100 | | 0.063 | | -0.091 | | -0.080 | | -0.168 | |  | |  | |  | |  | |  | |  | |  |  |  |  |  |
| TN-DS | | 0.071 | | 0.021 | | -0.096 | | 0.039 | | -0.170 | | 0.466 | |  | |  | |  | |  | |  | |  |  |  |  |  |
| SP-WW | | 0.083 | | -0.072 | | 0.064 | | 0.063 | | -0.117 | | 0.098 | | 0.003 | |  | |  | |  | |  | |  |  |  |  |  |
| SP-DS | | 0.129 | | 0.040 | | -0.025 | | 0.003 | | -0.027 | | 0.178 | | 0.037 | | 0.537 | |  | |  | |  | |  |  |  |  |  |
| PL-WW | | -0.026 | | -0.003 | | 0.050 | | 0.385 | | 0.099 | | -0.008 | | -0.043 | | 0.457 | | 0.250 | |  | |  | |  |  |  |  |  |
| PL-DS | | -0.061 | | 0.214 | | 0.000 | | 0.088 | | 0.277 | | -0.043 | | -0.112 | | 0.045 | | 0.399 | | 0.121 | |  | |  |  |  |  |  |
| PPB-WW | | 0.084 | | -0.084 | | 0.111 | | 0.149 | | 0.025 | | 0.038 | | -0.036 | | 0.535 | | 0.252 | | 0.523 | | 0.004 | |  |  |  |  |  |
| PPB-DS | | 0.063 | | 0.240 | | -0.079 | | -0.010 | | 0.050 | | 0.052 | | 0.021 | | 0.166 | | 0.513 | | 0.056 | | 0.621 | | 0.063 |  |  |  |  |
| FG-WW | | 0.088 | | 0.020 | | 0.165 | | 0.055 | | 0.124 | | 0.066 | | -0.090 | | 0.340 | | 0.489 | | 0.176 | | -0.028 | | 0.196 | -0.038 |  |  |  |
| FG-DS | | 0.029 | | 0.064 | | 0.114 | | 0.041 | | 0.125 | | 0.085 | | -0.078 | | 0.284 | | 0.471 | | 0.153 | | 0.026 | | 0.132 | -0.043 | 0.888 |  |  |
| BY-WW | | -0.121 | | 0.096 | | -0.061 | | -0.080 | | -0.057 | | 0.086 | | 0.080 | | -0.070 | | -0.107 | | -0.093 | | -0.020 | | -0.053 | 0.070 | -0.269 | -0.286 |  |
| BY-DS | | -0.054 | | -0.056 | | -0.099 | | -0.062 | | -0.097 | | 0.077 | | 0.019 | | -0.079 | | -0.074 | | -0.108 | | -0.073 | | 0.027 | -0.031 | -0.169 | -0.203 | 0.632 |

*HD, Heading day under WW and DS; FLW, Flag leaf width (cm); DLR, Drought leaf rolling under DS; PH-WW, Plant height (cm) under WW; PH-DS, Plant height (cm) under DS; TN-WW, Productive tiller number under WW; TN-DS, Productive tiller number under DS; SP-WW, Spikelet per panicle number under WW; SP-DS, Spikelet per panicle number under DS; PL-WW, Panicle length (cm) under WW; PL-DS, Panicle length (cm) under DS; PPB-WW, Primary panicle branch number under WW; PPB-DS, Primary panicle branch number under DS; FG-WW, Filled grain per panicle number under WW; FG-DS, Filled grain per panicle number under DS; BY-WW, Biological yield (g) under WW; BY-DS, Biological yield (g) under DS.
